# Supplementary material for: Mid-infrared spectroscopic screening of metabolic alterations in stress-exposed gilthead seabream (Sparus aurata)
Source: PubMed Central journal article supplement (PMC7529800; doi:10.1038/s41598-020-73338-z), 2020-10-01
Supplement: 41598_2020_73338_MOESM1_ESM.pdf [file 41598_2020_73338_MOESM1_ESM.pdf]

## **Mid-infrared spectroscopic screening of metabolic alterations in stress-exposed Gilthead seabream (*Sparus aurata*)**

Cláudia Raposo de Magalhães<sup>1,a</sup>, Raquel Carrilho<sup>1,a</sup>, Denise Schrama<sup>1</sup>, Marco Cerqueira<sup>1</sup>, Ana M. Rosa da Costa<sup>2</sup>, Pedro Rodrigues<sup>1,\*</sup>

<sup>1</sup> Centre of Marine Sciences, CCMAR, Universidade do Algarve, Campus de Gambelas, Edifício 7, 8005-139 Faro, Portugal

<sup>2</sup> Algarve Chemistry Research Centre, CIQA, Universidade do Algarve, Campus de Gambelas, Edifício 2, 8005-139 Faro, Portugal

<sup>a</sup> Both authors contributed equally to this work

\* Corresponding author: pmrodrig@ualg.pt

## Supplementary Information

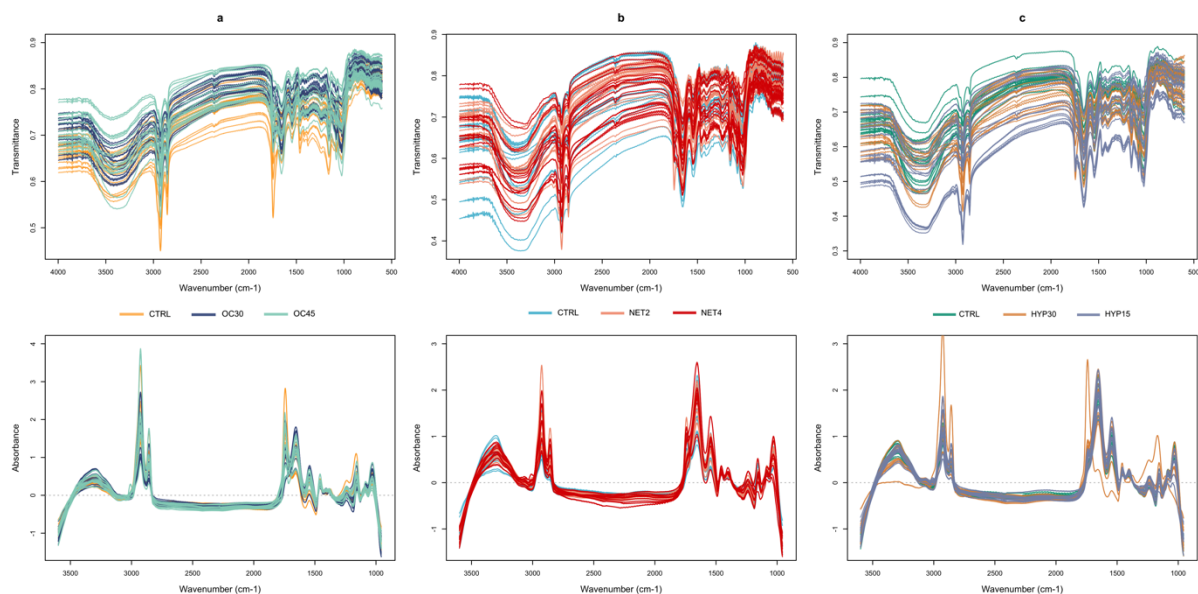

**Supplementary Figure S1** - Fourier transform infrared (FTIR) spectra ( $n = 18$  per experimental condition) of Gilthead seabream (*Sparus aurata*) liver submitted to three different stressful rearing conditions ((a) – OC trial, (b) – NET trial, (c) – HYP trial). Raw transmittance spectra are represented in the first row, while processed absorbance spectra, used for multivariate and univariate analyses, are displayed in the second row.

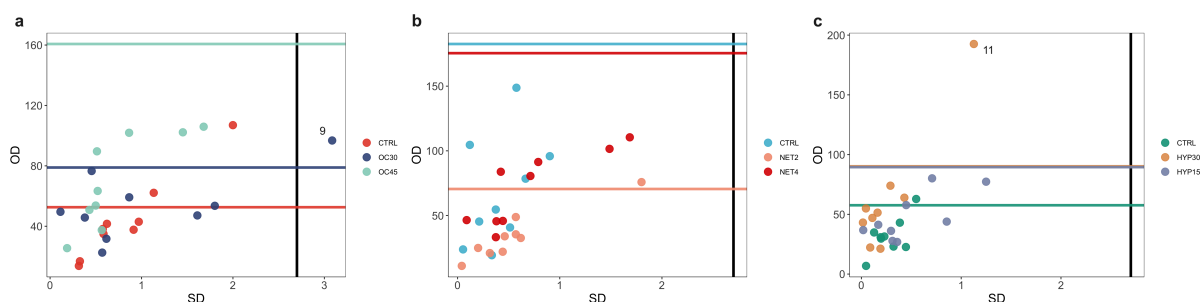

**Supplementary Figure S2** – Multivariate outlier detection on the fourier transform infrared (FTIR) spectra of Gilthead seabream (*Sparus aurata*) liver submitted to three different stressful rearing conditions ((a) – OC trial, (b) – NET trial, (c) – HYP trial). A robust principal component analysis was performed through the projection pursuit method using the GRID algorithm. Bad leverage points and orthogonal outliers which proved to be a some kind of measurement error were eliminated from the datasets, here represented by the corresponding sample number.
